# Supplementary material
Source: Research Square preprint supplement (doi:10.21203/rs.3.rs-8720147/v1)
Supplement: Supplementary file 1 [file 5b64824e3845906f0558cb9b.docx]

Supplementary Material 1

Data Collection Form (Telephone Interview & Medical Record Abstraction)/ (English Version):

The following form was used as a structured data collection sheet to record demographic, reproductive, familial, and tumor-related variables. Data were obtained through telephone interviews with patients and review of medical records.

Section A. Tumor Grade

1. What is the relationship between family size and the histological grade of breast tumor in the affected patient?

- Grade 1 and 2
  - Number of family members: 5 or more / 4 or fewer
- Grade 3
  - Number of family members: 5 or more / 4 or fewer

2. What is the relationship between the number of pregnancies of the affected patient and the histological grade of breast tumor?

- Grade 1 and 2
  - Number of pregnancies: 3 or more / 2 or fewer
- Grade 3
  - Number of pregnancies: 3 or more / 2 or fewer

3. What is the relationship between the number of months of breastfeeding during infancy and the histological grade of breast tumor?

- Grade 1 and 2
  - Number of months of breastfeeding: 1 year or more / less than 1 year
- Grade 3
  - Number of months of breastfeeding: 1 year or more / less than 1 year

4. What is the relationship between maternal age (patient’s mother) at the patient’s birth and the histological grade of breast tumor?

- Grade 1 and 2
  - Maternal age: 35 years or older / younger than 35 years
- Grade 3
  - Maternal age: 35 years or older / younger than 35 years

5. What is the relationship between paternal age (patient’s father) at the patient’s birth and the histological grade of breast tumor?

- Grade 1 and 2
  - Paternal age: 35 years or older / younger than 35 years
- Grade 3
  - Paternal age: 35 years or older / younger than 35 years

6. What is the relationship between the patient’s age at first pregnancy and the histological grade of breast tumor?

- Grade 1 and 2
  - Maternal age: 35 years or older / younger than 35 years
- Grade 3
  - Maternal age: 35 years or older / younger than 35 years

7. What is the relationship between the interval between the first and last pregnancy of the affected patient and the histological grade of breast tumor?

- Grade 1 and 2
  - Inter-pregnancy interval: 3 years or more / less than 3 years
- Grade 3
  - Inter-pregnancy interval: 3 years or more / less than 3 years

8. What is the relationship between the interval between the first and last pregnancy of the patient’s mother and the histological grade of breast tumor?

- Grade 1 and 2
  - Inter-pregnancy interval: 3 years or more / less than 3 years
- Grade 3
  - Inter-pregnancy interval: 3 years or more / less than 3 years

9. What is the relationship between age at first pregnancy of the affected patient and the histological grade of breast tumor?

- Grade 1 and 2
  - Age at first pregnancy: 35 years or older / younger than 35 years
- Grade 3
  - Age at first pregnancy: 35 years or older / younger than 35 years

10. What is the relationship between history of pregnancy and the histological grade of breast tumor?

- Grade 1 and 2
  - History of pregnancy: Yes / No
- Grade 3
  - History of pregnancy: Yes / No

11. What is the relationship between the number of children of the affected patient and the histological grade of breast tumor?

- Grade 1 and 2
  - Number of children: 3 or more / 2 or fewer
- Grade 3
  - Number of children: 3 or more / 2 or fewer

12. What is the relationship between birth order of the affected patient and the histological grade of breast tumor?

Section B. Hormone Receptor Status (ER/PR)

13. What is the relationship between family size and hormone receptor status of the breast tumor?

- ER positive / PR positive
  - Number of family members: 5 or more / 4 or fewer
- ER negative / PR negative
  - Number of family members: 5 or more / 4 or fewer

14. What is the relationship between the number of pregnancies of the affected patient and hormone receptor status of the breast tumor?

- ER positive / PR positive
  - Number of pregnancies: 3 or more / 2 or fewer
- ER negative / PR negative
  - Number of pregnancies: 3 or more / 2 or fewer

15. What is the relationship between paternal age at the patient’s birth and hormone receptor status of the breast tumor?

- ER positive / PR positive
  - Paternal age: 35 years or older / younger than 35 years
- ER negative / PR negative
  - Paternal age: 35 years or older / younger than 35 years

16. What is the relationship between duration of breastfeeding of the affected patient and hormone receptor status of the breast tumor?

- ER positive / PR positive
  - Number of months of breastfeeding: 1 year or more / less than 1 year
- ER negative / PR negative
  - Number of months of breastfeeding: 1 year or more / less than 1 year

17. What is the relationship between duration of breastfeeding during infancy of affected patient and hormone receptor status of the breast tumor?

- ER positive / PR positive
  - Number of months of breastfeeding: 1 year or more / less than 1 year
- ER negative / PR negative
  - Number of months of breastfeeding: 1 year or more / less than 1 year

18. What is the relationship between maternal age at pregnancy (patient’s mother) and hormone receptor status of the breast tumor?

- ER positive / PR positive
  - Maternal age: 35 years or older / younger than 35 years
- ER negative / PR negative
  - Maternal age: 35 years or older / younger than 35 years

19. What is the relationship between the interval between the first and last pregnancy of the affected patient and hormone receptor status of the breast tumor?

- ER positive / PR positive
  - Inter-pregnancy interval: 3 years or more / less than 3 years
- ER negative / PR negative
  - Inter-pregnancy interval: 3 years or more / less than 3 years

20. What is the relationship between the interval between the first and last pregnancy of the patient’s mother and hormone receptor status of the breast tumor?

- ER positive / PR positive
  - Inter-pregnancy interval: 3 years or more / less than 3 years
- ER negative / PR negative
  - Inter-pregnancy interval: 3 years or more / less than 3 years

21. What is the relationship between age at first pregnancy of the affected patient and hormone receptor status of the breast tumor?

- ER positive / PR positive
  - age: 35 years or older / younger than 35 years
- ER negative / PR negative
  - age: 35 years or older / younger than 35 years

22. What is the relationship between history of pregnancy of the affected patient and hormone receptor status of the breast tumor?

- ER positive / PR positive
  - History of pregnancy: Yes / No
- ER negative / PR negative
  - History of pregnancy: Yes / No

23. What is the relationship between number of children of the affected patient and hormone receptor status of the breast tumor?

24. What is the relationship between birth order of the affected patient and hormone receptor status of the breast tumor?

Section C. Age at Onset of Breast Cancer

25. What is the relationship between family size and age at onset of breast cancer?

- Age 35 years or older
  - Number of family members: 5 or more / 4 or fewer
- Age younger than 35 years
  - Number of family members: 5 or more / 4 or fewer

26. What is the relationship between the number of pregnancies of the affected patient and age at onset of breast cancer?

- Age 35 years or older
  - Number of pregnancies: 3 or more / 2 or fewer
- Age younger than 35 years
  - Number of pregnancies: 3 or more / 2 or fewer

27. What is the relationship between the number of months of breastfeeding of the affected patient to her infant and age at onset of breast cancer?

- Age 35 years or older
  - Number of months of breastfeeding: 1 year or more / less than 1 year
- Age younger than 35 years
  - Number of months of breastfeeding: 1 year or more / less than 1 year

28. What is the relationship between the number of months of breastfeeding during the patient’s infancy and age at onset of breast cancer?

- Age 35 years or older
  - Number of months of breastfeeding: 1 year or more / less than 1 year
- Age younger than 35 years
  - Number of months of breastfeeding: 1 year or more / less than 1 year

29. What is the relationship between paternal age at the patient’s birth and age at onset of breast cancer?

- Age 35 years or older
  - Paternal age: 35 years or older / younger than 35 years
- Age younger than 35 years
  - Paternal age: 35 years or older / younger than 35 years

30. What is the relationship between maternal age (patient’s mother) at pregnancy and age at onset of breast cancer?

- Age 35 years or older
  - Maternal age: 35 years or older / younger than 35 years
- Age younger than 35 years
  - Maternal age: 35 years or older / younger than 35 years

31. What is the relationship between the interval between the first and last pregnancy of the affected patient and age at onset of breast cancer?

- Age 35 years or older
  - Inter-pregnancy interval: 3 years or more / less than 3 years
- Age younger than 35 years
  - Inter-pregnancy interval: 3 years or more / less than 3 years

32. What is the relationship between the interval between the first and last pregnancy of the patient’s mother and age at onset of breast cancer?

- Age 35 years or older
  - Inter-pregnancy interval: 3 years or more / less than 3 years
- Age younger than 35 years
  - Inter-pregnancy interval: 3 years or more / less than 3 years

33. What is the relationship between age at first pregnancy of the affected patient and age at onset of breast cancer?

- Age 35 years or older
  - Age at first pregnancy: 35 years or older / younger than 35 years
- Age younger than 35 years
  - Age at first pregnancy: 35 years or older / younger than 35 years

34. What is the relationship between history of pregnancy of the affected patient and age at onset of breast cancer?

- Age 35 years or older
  - History of pregnancy: Yes / No
- Age younger than 35 year
  - History of pregnancy: Yes / No

35. What is the relationship between number of children of the affected patient and age at onset of breast cancer?

- Age 35 years or older
  - Number of children: 3 or more / 2 or fewer
- Age younger than 35 years
  - Number of children: 3 or more / 2 or fewer

36. What is the relationship between birth order of the affected patient and age at onset of breast cancer?

Section D. Tumor Stage

37. What is the relationship between family size and stage of breast tumor?

- Stage I and II
  - Number of family members: 5 or more / 4 or fewer
- Stage III and IV
  - Number of family members: 5 or more / 4 or fewer

38. What is the relationship between the number of pregnancies of the affected patient and stage of breast tumor?

- Stage I and II
  - Number of pregnancies: 3 or more / 2 or fewer
- Stage III and IV
  - Number of pregnancies: 3 or more / 2 or fewer

39. What is the relationship between the number of months of breastfeeding of the affected patient to her own infant and stage of breast tumor?

- Stage I and II
  - Number of months of breastfeeding: 1 year or more / less than 1 year
- Stage III and IV
  - Number of months of breastfeeding: 1 year or more / less than 1 year

40. What is the relationship between the number of months of breastfeeding during infancy (the patient as an infant) and stage of breast tumor?

- Stage I and II
  - Number of months of breastfeeding: 1 year or more / less than 1 year
- Stage III and IV
  - Number of months of breastfeeding: 1 year or more / less than 1 year

41. What is the relationship between paternal age at the patient’s birth and stage of breast tumor?

- Stage I and II
  - Paternal age: 35 years or older / younger than 35 years
- Stage III and IV
  - Paternal age: 35 years or older / younger than 35 years

42. What is the relationship between maternal age (patient’s mother) at pregnancy and stage of breast tumor?

- Stage I and II
  - Maternal age: 35 years or older / younger than 35 years
- Stage III and IV
  - Maternal age: 35 years or older / younger than 35 years

43. What is the relationship between the interval between the first and last pregnancy of the affected patient and stage of breast tumor?

- Stage I and II
  - Inter-pregnancy interval: 3 years or more / less than 3 years
- Stage III and IV
  - Inter-pregnancy interval: 3 years or more / less than 3 years

44. What is the relationship between the inter-pregnancy interval of the patient’s mother and stage of breast tumor?

- Stage I and II
  - Inter-pregnancy interval: 3 years or more / less than 3 years
- Stage III and IV
  - Inter-pregnancy interval: 3 years or more / less than 3 years

45. What is the relationship between age at first pregnancy of the affected patient and stage of breast tumor?

- Stage I and II
  - Age at first pregnancy: 35 years or older / younger than 35 years
- Stage III and IV
  - Age at first pregnancy: 35 years or older / younger than 35 years

46. What is the relationship between history of pregnancy of the affected patient and stage of breast tumor?

- Stage I and II
  - History of pregnancy: Yes / No
- Stage III and IV
  - History of pregnancy: Yes / No

47. What is the relationship between number of children of the affected patient and stage of breast tumor?

- Stage I and II
  - Number of children: 3 or more / 2 or fewer
- Stage III and IV
  - Number of children: 3 or more / 2 or fewer

48. What is the relationship between birth order of the affected patient and stage of breast tumor?

Supplementary Results

This supplementary file provides additional analyses and detailed results that support the findings presented in the main manuscript. Specifically, it includes exploratory multivariable regression analyses examining associations between reproductive and familial factors and hormone receptor status (ER, PR, and HER2), as well as additional tumor characteristics. These analyses were considered exploratory and are reported to provide transparency and completeness. Exploratory analyses of hormone receptor (ER and PR) and HER2 status are presented in the Supplementary Table S1.

*Supplementary Table S1. Exploratory univariable and multivariable logistic regression analyses of associations between reproductive and familial factors and ER, PR, and HER2 status*

| **Variable** | **Univariable OR (95% CI) – ER** | **p-value** | **Multivariable OR (95% CI) – ER** | **p-value** | **Univariable OR (95% CI) – PR** | **p-value** | **Multivariable OR (95% CI) – PR** | **p-value** | **Univariable OR (95% CI) – HER2** | **p-value** | **Multivariable OR (95% CI) – HER2** | **p-value** |
| --- | --- | --- | --- | --- | --- | --- | --- | --- | --- | --- | --- | --- |
| Age, years | 1.01 (0.98–1.03) | 0.48 | 1.00 (0.97–1.03) | 0.96 | 0.99 (0.97–1.02) | 0.69 | — | — | 1.005 (0.98–1.03) | 0.64 | — | — |
| Number of siblings | 1.04 (0.93–1.15) | 0.49 | — | — | 1.13 (1.02–1.25) | 0.02 | 1.14 (0.99–1.31) | 0.06 | 0.89 (0.81–0.98) | 0.02 | 1.10 (0.92–1.32) | 0.30 |
| Number of children | 0.88 (0.74–1.05) | 0.14 | 0.92 (0.72–1.17) | 0.49 | 0.92 (0.78–1.08) | 0.29 | 0.84 (0.68–1.05) | 0.12 | 1.16 (0.98–1.36) | 0.08 | 1.22 (0.91–1.63) | 0.19 |
| Duration of breastfeeding during infancy (patient as infant), years | 0.69 (0.41–1.16) | 0.16 | 0.76 (0.43–1.36) | 0.36 | 1.00 (0.66–1.52) | 0.99 | — | — | 0.81 (0.54–1.21) | 0.30 | 0.78 (0.46–1.34) | 0.37 |
| Cumulative duration of breastfeeding (own children), years | 0.98 (0.89–1.09) | 0.75 | — | — | 0.99 (0.90–1.10) | 0.93 | — | — | 1.02 (0.93–1.12) | 0.70 | — | — |
| Mother’s age, years | 1.01 (0.97–1.04) | 0.75 | — | — | 0.98 (0.95–1.01) | 0.24 | 0.97 (0.94–1.01) | 0.21 | 0.97 (0.94–1.01) | 0.12 | — | — |
| Father’s age, years | 1.01 (0.98–1.05) | 0.51 | — | — | 1.002 (0.97–1.03) | 0.87 | — | — | 0.96 (0.93–0.99) | 0.01 | 0.96 (0.91–1.01) | 0.11 |
| Age at first pregnancy, years | 1.04 (0.99–1.10) | 0.11 | 1.03 (0.97–1.10) | 0.33 | 1.01 (0.96–1.06) | 0.71 | — | — | 0.99 (0.94–1.03) | 0.52 | — | — |
| Mother’s pregnancy interval, years | 0.98 (0.94–1.02) | 0.26 | 0.99 (0.94–1.03) | 0.57 | 1.03 (0.99–1.07) | 0.13 | 1.03 (0.98–1.08) | 0.20 | 0.96 (0.92–0.99) | 0.02 | 0.95 (0.90–1.01) | 0.10 |
| Patient pregnancy interval, years | 1.00 (0.95–1.04) | 0.90 | — | — | 0.99 (0.95–1.04) | 0.81 | — | — | 1.04 (1.00–1.09) | 0.06 | 1.05 (0.99–1.11) | 0.11 |
| Birth order | 1.00 (0.88–1.14) | 0.98 | — | — | 1.04 (0.93–1.17) | 0.49 | — | — | 0.84 (0.74–0.95) | 0.01 | 0.90 (0.73–1.11) | 0.34 |

- *Binary logistic regression was used for ER, PR, and HER2 status.*
- *Odds ratios >1 indicate higher odds of receptor positivity.*
- *Multivariable models were adjusted for age and selected reproductive and familial covariates identified a priori.*
- *“—” indicates variables not retained in the multivariable model.*
- *Sample sizes varied across analyses due to exclusion of cases with missing receptor status.*
